# Supplementary material for: SOD1 activity threshold and TOR signalling modulate VAP(P58S) aggregation via reactive oxygen species-induced proteasomal degradation in a Drosophila model of amyotrophic lateral sclerosis
Source: Dis Model Mech. 2019 Feb 7;12(2):dmm033803. doi: 10.1242/dmm.033803 (PMC6398501; doi:10.1242/dmm.033803)
Supplement: Supplementary information [file dmm-12-033803-s1.pdf]

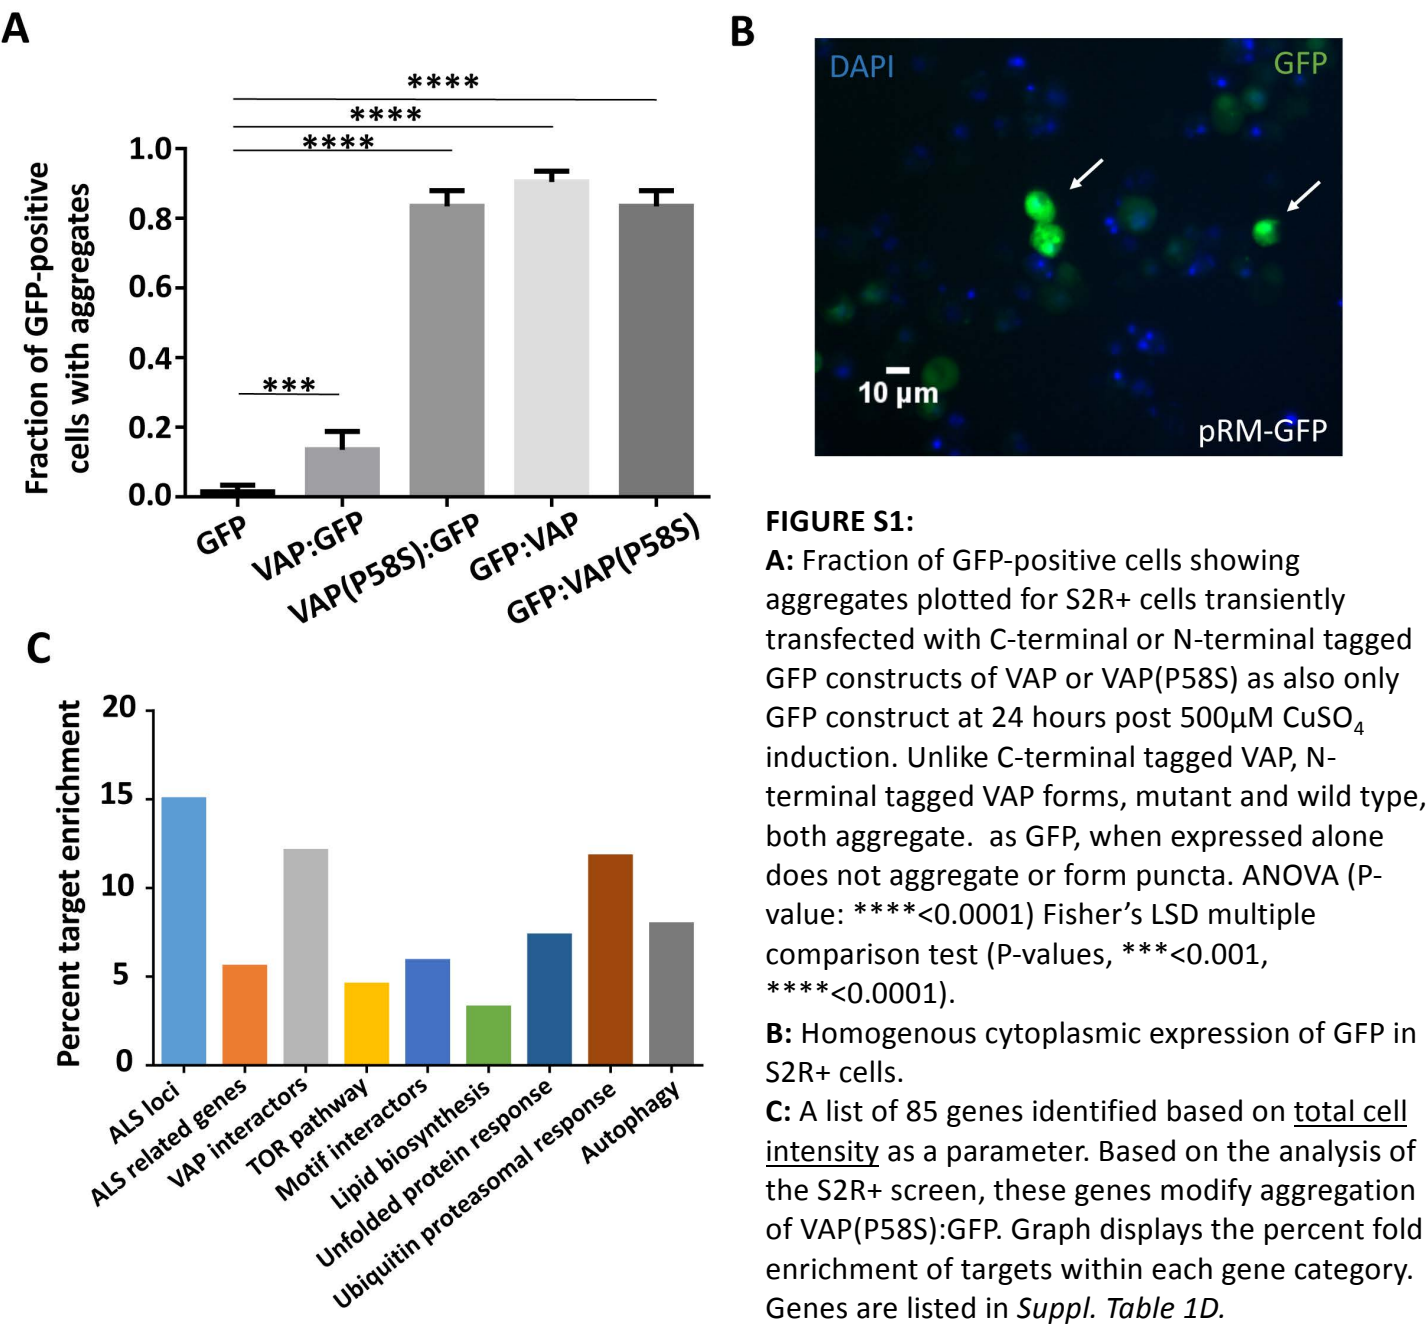

**FIGURE S1:**

**A:** Fraction of GFP-positive cells showing aggregates plotted for S2R+ cells transiently transfected with C-terminal or N-terminal tagged GFP constructs of VAP or VAP(P58S) as also only GFP construct at 24 hours post 500μM CuSO<sub>4</sub> induction. Unlike C-terminal tagged VAP, N-terminal tagged VAP forms, mutant and wild type, both aggregate. as GFP, when expressed alone does not aggregate or form puncta. ANOVA (P-value: \*\*\*\*<0.0001) Fisher's LSD multiple comparison test (P-values, \*\*\*<0.001, \*\*\*\*<0.0001).

**B:** Homogenous cytoplasmic expression of GFP in S2R+ cells.

**C:** A list of 85 genes identified based on total cell intensity as a parameter. Based on the analysis of the S2R+ screen, these genes modify aggregation of VAP(P58S):GFP. Graph displays the percent fold enrichment of targets within each gene category. Genes are listed in *Suppl. Table 1D*.

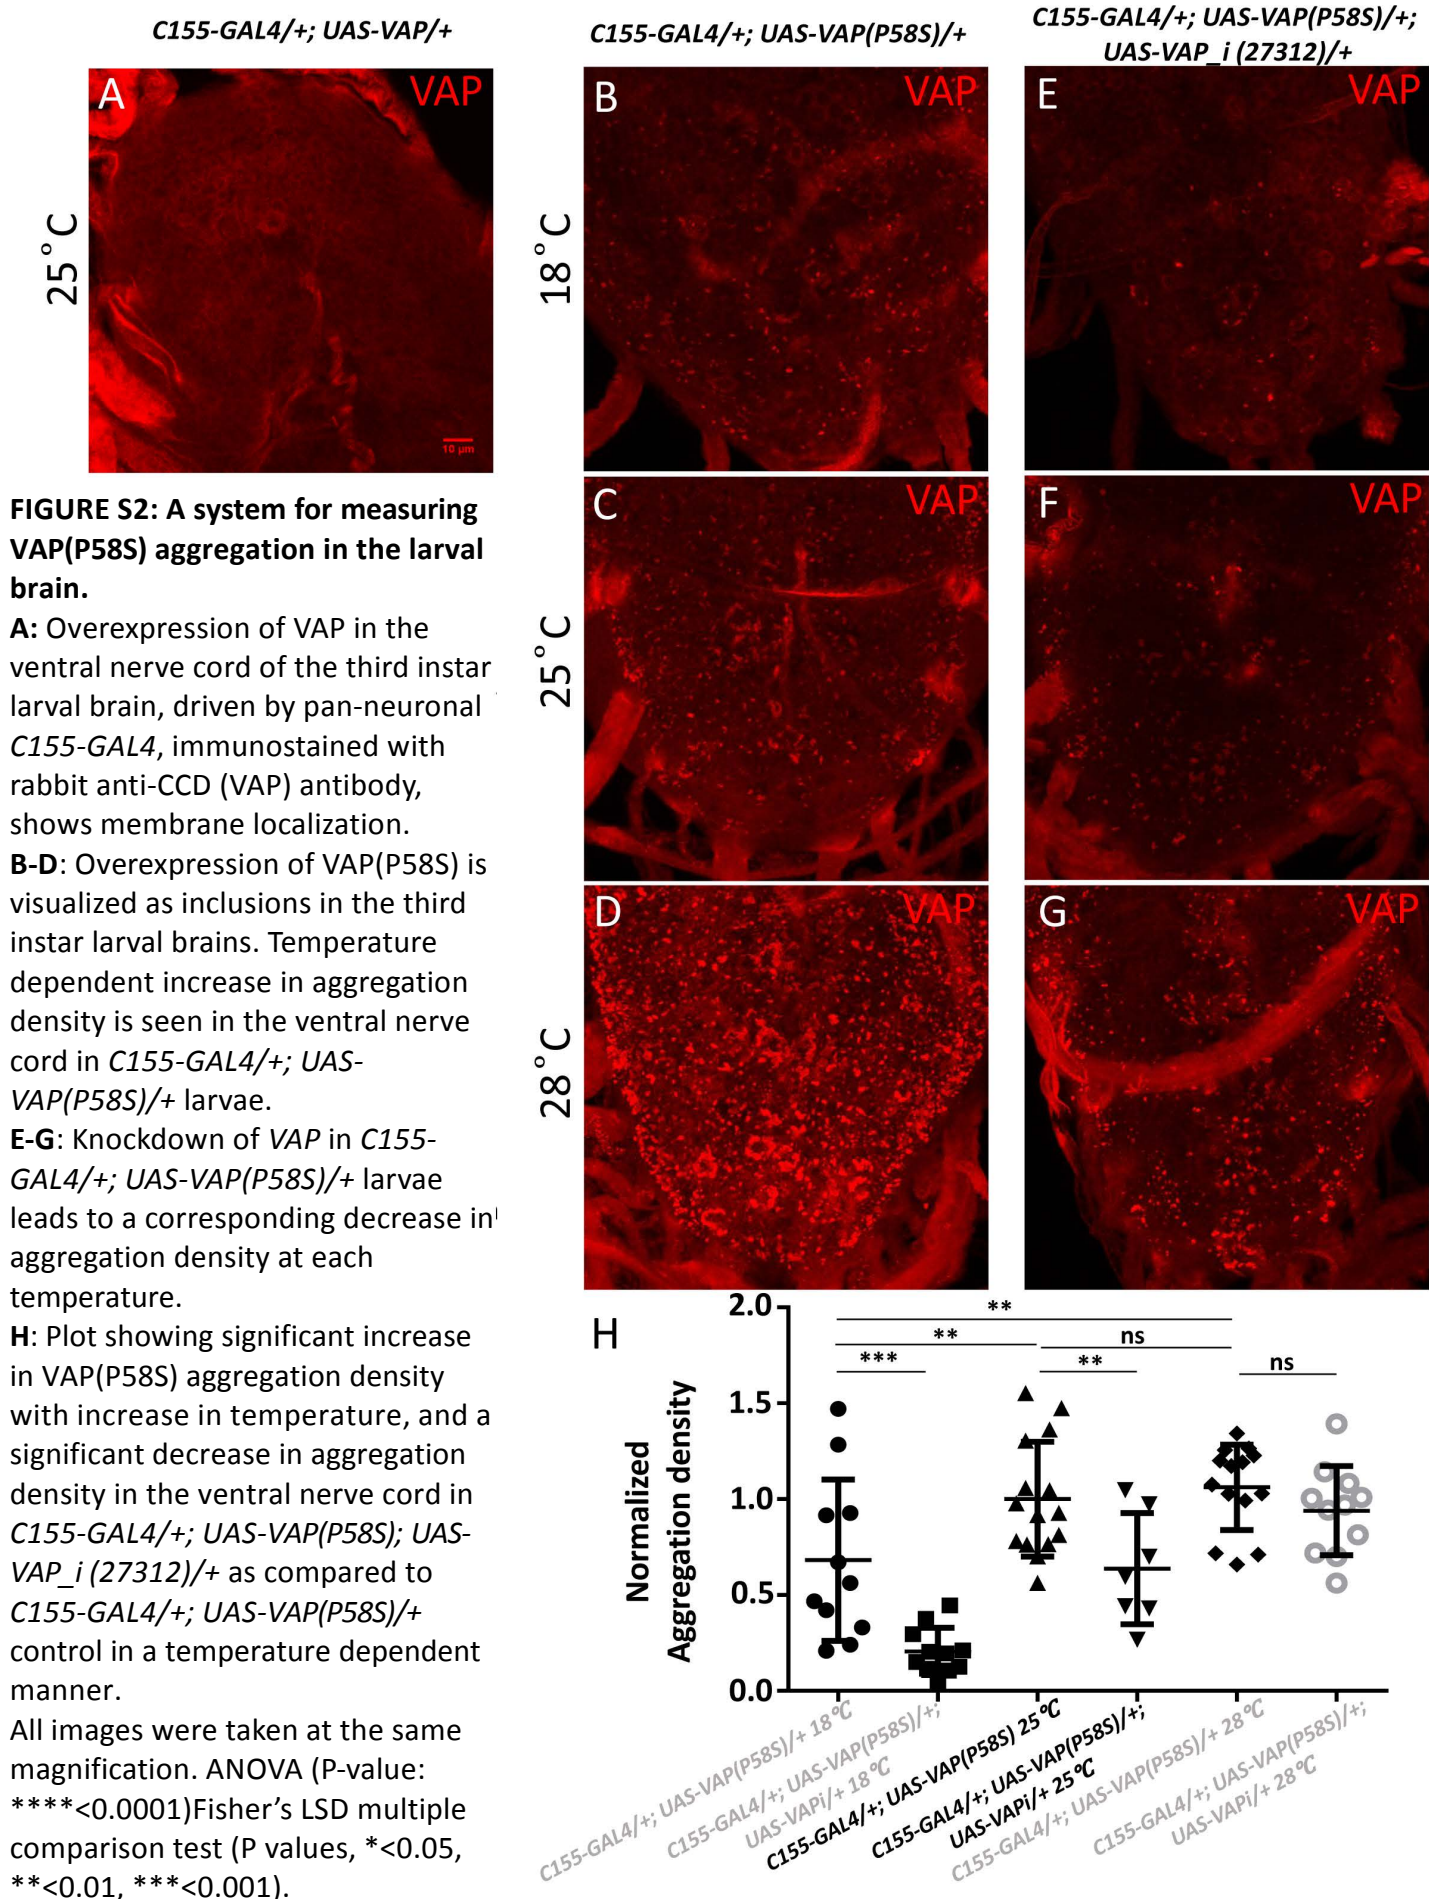

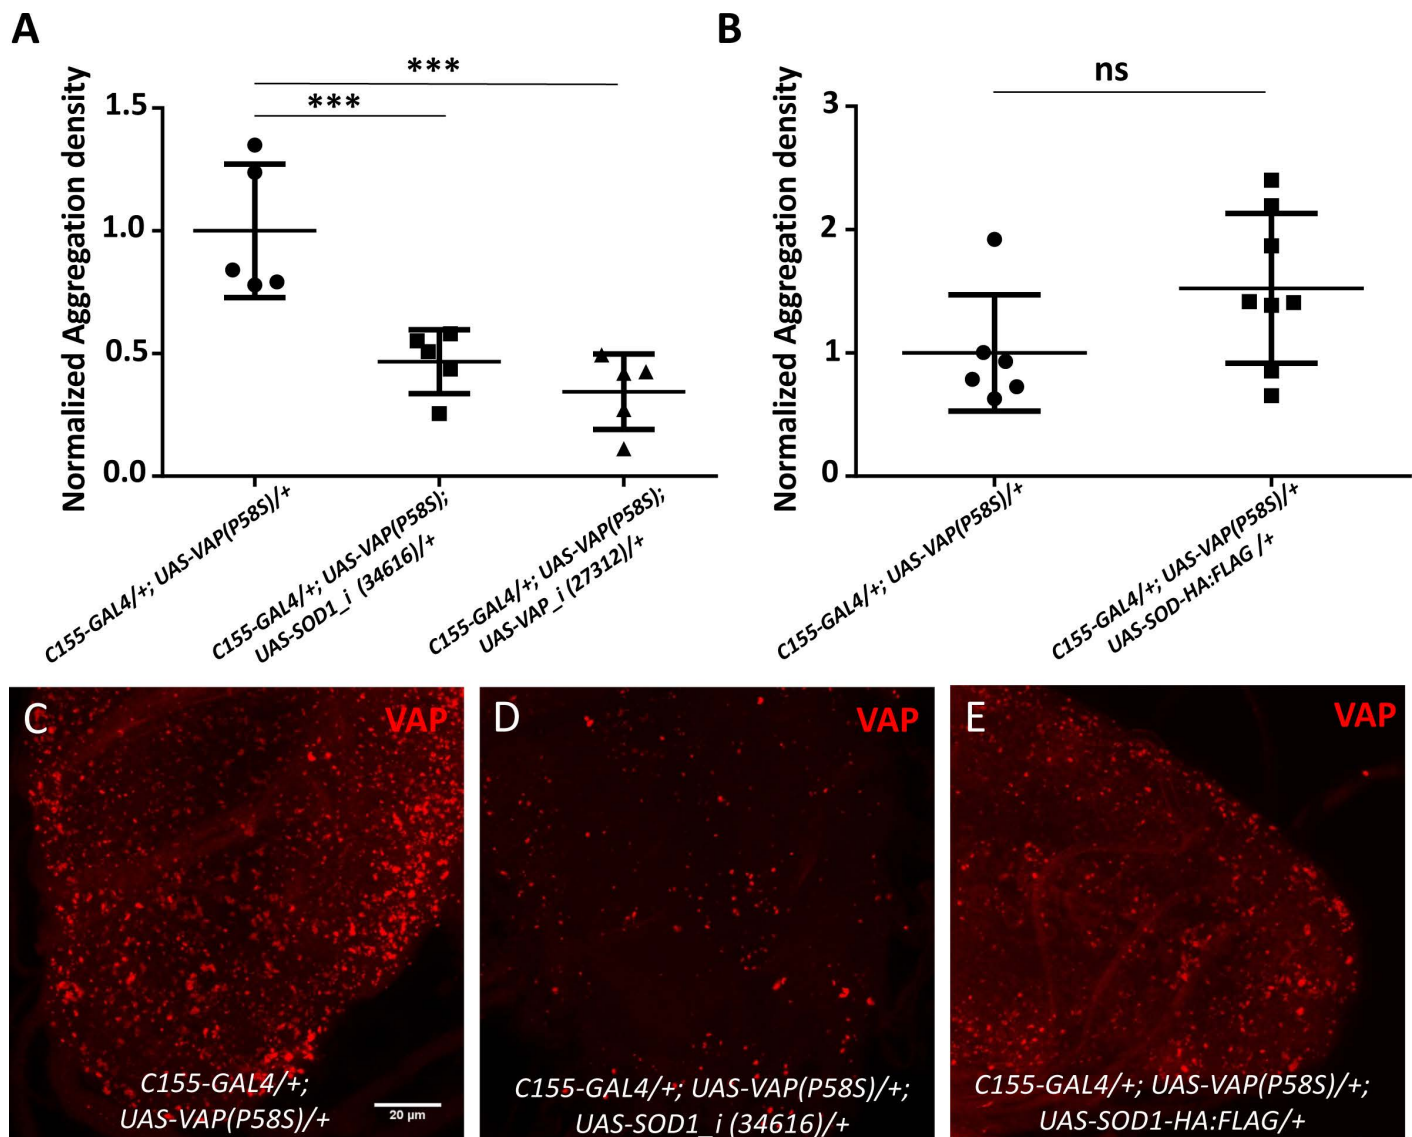

**FIGURE S3: SOD1 modulates VAP(P58S) aggregation density in the third instar larval brain**

**A:** *SOD1* knockdown decreases aggregation density. ANOVA (P-value \*\*\*, 0.0004) Fisher's LSD multiple comparison test (P-value, \*\*\*<0.001)

**B:** *SOD1:HA:Flag* overexpression does not affect aggregation density. Student's t test (P-value: 0.1066)

**C, D, E:** Representative images of the ventral nerve cord showing aggregation of VAP(P58S) (**C**), with *SOD1* knockdown (**D**), and with *SOD1-HA:Flag* overexpression (**E**). All images were taken at the same magnification. The '*i*' appended to the gene name indicates a RNAi line with the number in brackets denoting a unique BDSC number. ANOVA (P-value: \*\*\*\*<0.0001) Fisher's LSD multiple comparison test (P-value, \*\*<0.01, \*\*\*<0.001).

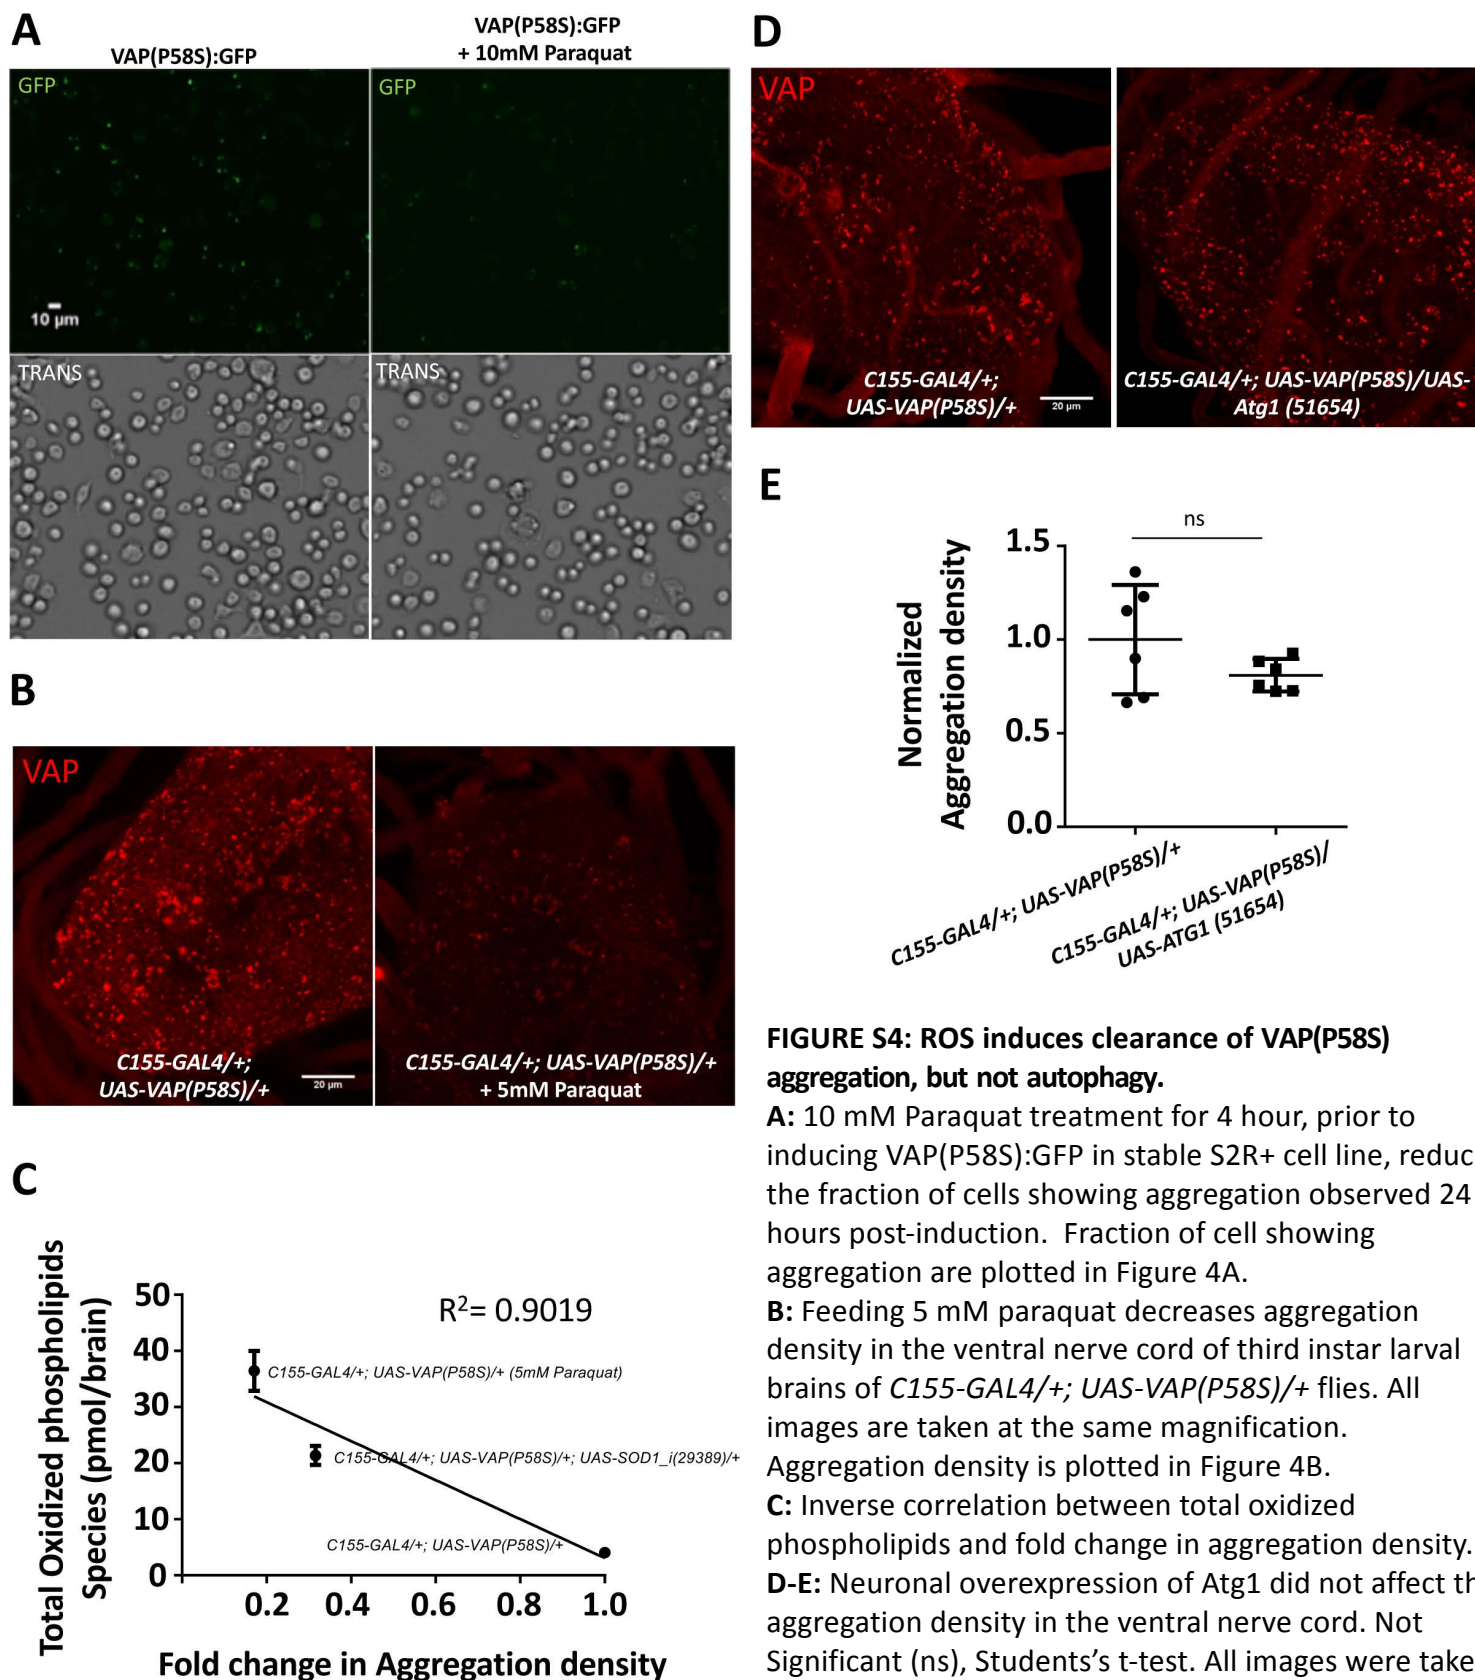

**FIGURE S4: ROS induces clearance of VAP(P58S) aggregation, but not autophagy.**

**A:** 10 mM Paraquat treatment for 4 hour, prior to inducing VAP(P58S):GFP in stable S2R+ cell line, reduces the fraction of cells showing aggregation observed 24 hours post-induction. Fraction of cell showing aggregation are plotted in Figure 4A.

**B:** Feeding 5 mM paraquat decreases aggregation density in the ventral nerve cord of third instar larval brains of *C155-GAL4/+; UAS-VAP(P58S)/+* flies. All images are taken at the same magnification. Aggregation density is plotted in Figure 4B.

**C:** Inverse correlation between total oxidized phospholipids and fold change in aggregation density.

**D-E:** Neuronal overexpression of Atg1 did not affect the aggregation density in the ventral nerve cord. Not Significant (ns), Student's t-test. All images were taken at the same magnification.

### Table S1

- A.** List of 900 genes utilized for the screen. List is sorted alphabetically based on gene symbol.
- B.** 900 genes, utilized for the screen, classified and listed into 10 categories associated with ALS or VAP or proteostasis.
- C.** List of 150 modifiers of VAP(P58S) aggregation, based on average cell intensity, along with their human orthologs.
- D.** List of 85 modifiers of VAP(P58S) aggregation, based on total cell intensity, along with their human orthologs.
- E.** List of 57 common modifiers of VAP(P58S) aggregation, along with their human orthologs.

[Click here to Download Table S1](#)

### Table S2

- A.** Details of the MRM transitions for the different phospholipids measured
- B.** LC-MS quantitation of the different phospholipids for different genotypes and paraquat treatment.
- C.** LC-MS quantitation of the different phospholipids for knockdown of *TOR*.

[Click here to Download Table S2](#)
